# Supplementary material for: Higher ratio of plasma omega-6/omega-3 fatty acids is associated with greater risk of all-cause, cancer, and cardiovascular mortality: a population-based cohort study in UK Biobank
Source: bioRxiv or medRxiv preprint supplement (doi:10.1101/2023.01.16.23284631), 2024-01-10
Supplement: Supplementary file [file media-1.pdf]

| <b>Table S1. Literature Review</b> |             |                                                                                                     |                     |                                      |                |                                                                                                 |                                                      |                                                                                                                                                                                                          |                                                              |     |                                                                                                                                                      |    |
|------------------------------------|-------------|-----------------------------------------------------------------------------------------------------|---------------------|--------------------------------------|----------------|-------------------------------------------------------------------------------------------------|------------------------------------------------------|----------------------------------------------------------------------------------------------------------------------------------------------------------------------------------------------------------|--------------------------------------------------------------|-----|------------------------------------------------------------------------------------------------------------------------------------------------------|----|
| <b>Author</b>                      | <b>Year</b> | <b>Study design/ location</b>                                                                       | <b>Endpoints</b>    | <b># Cohort</b>                      | <b># Cases</b> | <b>Exact exposure</b>                                                                           | <b>Exposure characterization</b>                     | <b>Measure of associations</b>                                                                                                                                                                           | <b>P for trend</b>                                           |     |                                                                                                                                                      |    |
| <i>Omega-6/omega-3 ratio</i>       |             |                                                                                                     |                     |                                      |                |                                                                                                 |                                                      |                                                                                                                                                                                                          |                                                              |     |                                                                                                                                                      |    |
| Noori et al. <sup>1</sup>          | 2011        | Prospective cohort/ hemodialysis patients, Southern California during 2001-2007                     | All-cause mortality | 145                                  | 42             | Dietary Omega-3<br>Dietary Omega-6/3                                                            | HR in quartiles (95% CI)                             | (Highest to lowest) 0.65 (0.21-1.97)<br>(Lowest to highest) 0.37 (0.14-1.08)                                                                                                                             | 0.1<br>0.04                                                  |     |                                                                                                                                                      |    |
| Harris et al. <sup>2</sup>         | 2017        | Prospective cohort/ women, Women's Health Initiative Memory Study, enrollment began 1996, age 65-80 | All-cause mortality | 6,501                                | 1,851          | Red blood cell Omega-3 index (EPA + DHA)<br>EPA<br>DHA<br>LA<br>N-6/N-3 ratio                   | HR per 1-SD increase in red blood cell PUFA (99% CI) | All<br>Omega-3 index: 0.92 (0.85-0.98)<br>EPA: 0.89 (0.82-0.96)<br>DHA: 0.93 (0.87-1.00)<br>LA: 0.99 (0.93-1.06)<br>N-6/N-3 ratio: 1.10 (1.02-1.19)                                                      | 0.0015<br>< 0.001<br>0.0099<br>0.8286<br>0.0021<br>NR        |     |                                                                                                                                                      |    |
|                                    |             |                                                                                                     | CVD mortality       |                                      |                |                                                                                                 |                                                      |                                                                                                                                                                                                          |                                                              | 617 | CVD<br>Omega-3 index: 0.97 (0.85-1.12)<br>EPA: 0.88 (0.77-1.00)<br>DHA: 1 (0.87-1.14)<br>LA: 0.96 (0.86-1.08)<br>N-6/N-3 ratio: 1.05 (0.9-1.23)      | NR |
|                                    |             |                                                                                                     | Cancer mortality    |                                      |                |                                                                                                 |                                                      |                                                                                                                                                                                                          |                                                              | 462 | Cancer<br>Omega-3 index: 0.92 (0.79-1.07)<br>EPA: 0.91 (0.78-1.07)<br>DHA: 0.93 (0.79-1.09)<br>LA: 0.94 (0.83-1.07)<br>N-6/N-3 ratio: 1.1 (0.93-1.3) |    |
| Otsuka et al. <sup>3</sup>         | 2019        | Prospective cohort study/ NILS-LSA, elderly individuals, Japan                                      | All-cause mortality | 1054                                 | 422            | n-6 intake<br>n-3 intake<br>EPA intake<br>DHA intake<br>Serum EPA<br>Serum DHA<br>Serum EPA/ARA | HR in tertiles (Highest to lowest; 95% CI)           | 0.80 (0.59-1.07)<br>0.83 (0.61-1.12)<br>0.96 (0.71-1.30)<br>0.95 (0.70-1.28)<br>0.81 (0.60-1.09)<br>0.73 (0.53-0.99)<br>0.71 (0.53-0.96)                                                                 | 0.13<br>0.22<br>0.78<br>0.72<br>0.17<br>0.047<br>0.02        |     |                                                                                                                                                      |    |
| Zhuang et al. <sup>4</sup>         | 2019        | Population based prospective cohort/ CHNS in China and NHANES in US                                 | All-cause mortality | CHNS:<br>14,117<br>NHANES:<br>36,032 | 1,007<br>4,826 | Total PUFA intake<br><br>Omega-3 intake<br><br>Omega-6 intake<br><br>Omega 6/3 ratio            | HR in quartiles (Highest to lowest; 95% CI)          | China: 1.19 (0.93-1.52)<br>US: 0.86 (0.71-1.03)<br>China: 1.22 (1.00-1.50)<br>US: 0.85 (0.71-1.01)<br>China: 1.14 (0.89-1.47)<br>US: 0.84 (0.70-1.01)<br>China: 0.95 (0.80-1.14)<br>US: 0.99 (0.89-1.11) | 0.10<br>0.05<br>0.05<br>0.03<br>0.29<br>0.04<br>0.54<br>0.85 |     |                                                                                                                                                      |    |
| <i>Circulating PUFAs</i>           |             |                                                                                                     |                     |                                      |                |                                                                                                 |                                                      |                                                                                                                                                                                                          |                                                              |     |                                                                                                                                                      |    |
| Wang et al. <sup>5</sup>           | 2003        | An epidemiological survey of 65 rural countries in China                                            | All-cause mortality | 6500                                 | NR             | DHA<br>EPA<br>Total plasma Omega-3<br>Total plasma Omega-6                                      | Pearson correlation coefficient                      | Around -0.3 (mortality)<br>Around -0.2 (mortality)<br>-0.152<br>-0.001                                                                                                                                   | NR                                                           |     |                                                                                                                                                      |    |

|                                  |      |                                                                                                                         |                                      |                                   |                       |                                                                            |                                                                                                                                |                                                                                                                                                                                                                                                                                                                                                                 |                                                                                                                          |
|----------------------------------|------|-------------------------------------------------------------------------------------------------------------------------|--------------------------------------|-----------------------------------|-----------------------|----------------------------------------------------------------------------|--------------------------------------------------------------------------------------------------------------------------------|-----------------------------------------------------------------------------------------------------------------------------------------------------------------------------------------------------------------------------------------------------------------------------------------------------------------------------------------------------------------|--------------------------------------------------------------------------------------------------------------------------|
| Lindberg et al. <sup>6</sup>     | 2008 | Prospective cohort/ Norway, elderly patients (mean=82.1), 3 y of follow-up                                              | All-cause mortality                  | 254                               | 101                   | Plasma EPA                                                                 | HR for quantile 1 (lowest, ref; 95% CI) compared with upper 3 quartiles combined                                               | 0.52 (0.35-0.77)                                                                                                                                                                                                                                                                                                                                                | NR                                                                                                                       |
| Chattipakorn et al. <sup>7</sup> | 2009 | Measure the heart tissues of cadavers with a history of CHD                                                             | -                                    | 100 cadavers                      | -                     | Omega-3 (EPA + DHA)<br>Omega-6 (AA + LA)                                   | P-value from two-sample Wilcoxon rank sum test (cardiac cause vs. noncardiac cause. Lower in the group with cardiac mortality) | Cadavers with heart disease<br>0.040<br>0.022                                                                                                                                                                                                                                                                                                                   | NR                                                                                                                       |
| Lee et al. <sup>8</sup>          | 2009 | Prospective cohort/ patients with acute myocardial infarction, 16.1 months follow-up                                    | All-cause mortality                  | 508                               | 36                    | Plasma EPA                                                                 | -                                                                                                                              | Lower plasma level of EPA was and independent predictor for all-cause mortality in female patients                                                                                                                                                                                                                                                              | NR                                                                                                                       |
| Pottala et al. <sup>9</sup>      | 2010 | Prospective cohort/ outpatients with stable coronary heart disease, recruited between 2000-2002, San Francisco Bay Area | All-cause mortality                  | 956                               | 237                   | EPA + DHA in whole blood                                                   | HR above vs. below median (95% CI)                                                                                             | 0.74 (0.55-1.00)                                                                                                                                                                                                                                                                                                                                                | 0.049                                                                                                                    |
| Petrone et al. <sup>10</sup>     | 2012 | Nested case-control/ US male physicians                                                                                 | Heart failure                        | 788 cases<br>788 matched controls | -                     | Plasma omega-6 PUFAs                                                       | OR in quartiles (Highest to lowest; 95% CI)                                                                                    | 0.87 (0.63-1.20)                                                                                                                                                                                                                                                                                                                                                | 0.39                                                                                                                     |
| Mozaffarian et al. <sup>11</sup> | 2013 | Prospective cohort/ older adults not taking fish oil supplements, 1992-2008, four US communities                        | All-cause mortality<br>CVD mortality | 2,692                             | 1,625<br>570          | Plasma Total n-3 PUFA                                                      | HR in quintiles (Highest to lowest; 95% CI)                                                                                    | 0.73 (0.61-0.86)<br>0.65 (0.48-0.87)                                                                                                                                                                                                                                                                                                                            | <0.001<br>< 0.001                                                                                                        |
| Wu et al. <sup>12</sup>          | 2014 | Community-based prospective cohort/ Cardiovascular Health Study, age>=65, US                                            | All-cause mortality<br>CVD mortality | 2,792                             | 1,994<br>678          | Plasma phospholipid n-6 PUFA<br>LA<br>(Others are NS)                      | HR in quintiles (Highest to lowest; 95% CI)                                                                                    | All-cause mortality<br>0.87 (0.74-1.02)<br>CVD mortality<br>0.78 (0.60-1.01)                                                                                                                                                                                                                                                                                    | 0.005<br>0.02                                                                                                            |
| Eide et al. <sup>13</sup>        | 2016 | Cross-sectional study/ Renal transplant recipients, transplanted 1999-2011                                              | CVD mortality                        | 1990                              | NR                    | plasma Marine n-3 PUFA levels                                              | Per 1.0 wt% increase (95% CI)                                                                                                  | 0.90 (0.82-0.98)                                                                                                                                                                                                                                                                                                                                                | NR                                                                                                                       |
| Kleber et al. <sup>14</sup>      | 2016 | Prospective cohort/ patients referred for coronary angiography, LURIC study, German                                     | All-cause mortality<br>CVD mortality | 3259                              | 975<br>614            | erythrocytes (red cells)<br>EPA<br>HS-Omega-3 Index                        | HR in tertiles (Highest to lowest; 95% CI)                                                                                     | EPA<br>All: 0.75 (0.64-0.88)<br>CVD: 0.70 (0.57-0.86)<br>HS-Omega-3 Index<br>All: 0.78 (0.67-0.92)<br>CVD: 0.78 (0.64-0.95)                                                                                                                                                                                                                                     | 0.001<br>0.003<br>0.009<br>0.050                                                                                         |
| Miura et al. <sup>15</sup>       | 2016 | Population based prospective cohort/ Austria, drawn from Nambour Skin Cancer Study, in 1986                             | All-cause mortality                  | 1,008                             | 179<br>M: 98<br>F: 81 | Plasma total Omega-3<br><br>EPA<br><br>DPA<br><br>DHA<br><br>Total Omega-6 | HR per 1-SD increase (95% CI)                                                                                                  | All: 0.96 (0.82-1.12)<br>M: 0.99 (0.80-1.22)<br>F: 0.95 (0.76-1.19)<br>All: 0.81 (0.69-0.95)<br>M: 0.78 (0.62-0.98)<br>F: 0.78 (0.65-0.94)<br>All: 0.90 (0.77-1.05)<br>M: 0.76 (0.60-0.97)<br>F: 0.98 (0.79-1.22)<br>All: 1.07 (0.92-1.25)<br>M: 1.12 (0.92-1.36)<br>F: 1.02 (0.82-1.28)<br>All: 0.87 (0.73-1.04)<br>M: 0.80 (0.92-1.04)<br>F: 0.96 (0.76-1.21) | 0.62<br>0.90<br>0.66<br>0.012<br>0.036<br>0.007<br>0.08<br>0.028<br>0.86<br>0.35<br>0.25<br>0.83<br>0.13<br>0.10<br>0.71 |
| Chen et al. <sup>16</sup>        | 2016 | Meta-analysis/ general populations                                                                                      | All-cause mortality                  | 11 studies<br>371,965             | 31,185                |                                                                            | Summary RR (Highest to lowest; 95% CI)                                                                                         |                                                                                                                                                                                                                                                                                                                                                                 | NR                                                                                                                       |

|                                                                    |      |                                                                                     |                                                                        |                                                                                                                                               |                                                                                                       |                                                    |                                                                           |                                                                                                                                                                                                          |                                      |
|--------------------------------------------------------------------|------|-------------------------------------------------------------------------------------|------------------------------------------------------------------------|-----------------------------------------------------------------------------------------------------------------------------------------------|-------------------------------------------------------------------------------------------------------|----------------------------------------------------|---------------------------------------------------------------------------|----------------------------------------------------------------------------------------------------------------------------------------------------------------------------------------------------------|--------------------------------------|
| (Included Mozaffarian et al. and Bell et al. reports in the table) |      |                                                                                     |                                                                        | Dietary intakes (n=7)<br>361,273<br>Circulating levels (n=4)<br>10,692                                                                        | 27,624<br><br>3,561                                                                                   | Circulating EPA<br>Circulating DHA                 |                                                                           | 0.74 (0.60-0.90)<br>0.78 (0.64-0.93)                                                                                                                                                                     |                                      |
| Delgado et al. <sup>17</sup>                                       | 2017 | Prospective cohort/ patients referred for coronary angiography, LURIC study, German | All-cause mortality<br>CVD mortality                                   | 3259                                                                                                                                          | 975<br>614                                                                                            | Plasma total omega-6 PUFA<br><br>GLA<br>ADA<br>DPA | 1 SD increase (95 % CI)                                                   | All: 0.93 (0.87-0.99)<br>CVD: 0.95 (0.87-1.03)<br><br>All: 0.88 (0.82-0.95)<br>CVD: 0.86 (0.79-0.95)<br>All: 1.10 (1.03-1.18)<br>CVD: 1.12 (1.04-1.22)<br>All: 1.12 (1.05-1.19)<br>CVD: 1.11 (1.02-1.20) | NR                                   |
| Hamazaki et al. <sup>18</sup>                                      | 2018 | Nested case-control study/ JPHC study, Japan                                        | Coronary heart disease                                                 | 209 cases<br>418 matched controls                                                                                                             | (168 myocardial infarction<br>41 sudden cardiac death)<br>(157 non-fatal coronary events<br>52 fatal) | Plasma n-3 PUFAs                                   | OR in quartiles (Highest to lowest; 95% CI)                               | CHD:0.79 (0.41-1.51)<br>MI: 0.91 (0.43-1.89)<br>Sudden death: 0.08 (0.01-0.88)<br>Non-fatal: 0.89 (0.42-1.89)<br>Fatal: 0.12 (0.02-0.75)                                                                 | 0.51<br>0.90<br>0.04<br>0.97<br>0.03 |
| Harris et al. <sup>19</sup>                                        | 2018 | Prospective cohort study/ the Framingham Heart Study Offspring cohort, US           | All-cause mortality<br>CVD mortality<br>Cancer mortality<br>CVD events | 2500                                                                                                                                          | 350<br>58<br>146<br>245                                                                               | Omega-3 index<br>red blood cells                   | HR in quintiles (Highest to lowest; 95% CI)                               | All-death: 0.66 (0.45-0.96)<br>CVD mortality: 0.39 (0.15-1.02)<br>Cancer mortality: 0.96 (0.56-1.64)<br>CVD events: 0.61 (0.37-0.99)                                                                     | 0.02<br>0.10<br>0.88<br>0.008        |
| Kamleh et al. <sup>20</sup>                                        | 2018 | Case-control study/ IMPROVE pan-European cohort, age 55-79                          | Incidence of CVD events                                                | Cases: 173<br>Matched controls: 172<br>Diabetics<br>Cases: 40<br>Matched controls: 39<br>Non-diabetics<br>Cases: 133<br>Matched controls: 133 | -                                                                                                     | Plasma DHA<br><br>GLA<br>AA<br>ADA                 | HR per 1-SD increase in log transformed metabolite concentration (95% CI) | Diabetics: NS<br>Non-diabetics:<br>DHA: 0.86 (0.72-1.02)<br><br>GLA: 0.72 (0.59-0.88)<br>AA: 0.83 (0.70-0.99)<br>ADA: 0.79 (0.66-0.95)                                                                   | 0.085<br><br>0.001<br>0.037<br>0.012 |
| Miura et al. <sup>21</sup>                                         | 2018 | Community-based prospective cohort/ women, 25-75 age, Australia                     | All-cause mortality                                                    | 564                                                                                                                                           | 81                                                                                                    | Plasma Omega-3<br>Omega-6                          | HR in tertiles (Highest to lowest; 95% CI)                                | Absolute (ug/ml)<br>Omega-3: 1.05 (0.57-1.92)<br>Omega-6: 1.19 (0.65-2.18)<br>Relative (%)<br>Omega-3: 0.97 (0.54-1.72)<br>Omega-6: 1.02 (0.58-1.78)                                                     | 0.84<br>0.60<br>0.77<br>1.00         |
| Marklund et al. <sup>22</sup>                                      | 2019 | Meta-analysis                                                                       | Total CVD<br>CVD mortality<br>Total CHD<br>Ischemic stroke             | 30 prospective studies:<br><br>18 cohort<br>12 nested case-control or                                                                         | 10,477<br>4,508<br>11,857<br>3,705                                                                    | Circulating LA<br><br>AA                           | HR per interquintile range (95% CI)                                       | LA<br>Total CVD: 0.93 (0.88-0.99)<br>CVD mortality: 0.78 (0.70-0.85)<br>Total CHD: 0.94 (0.88-1.00)<br>Ischemic stroke: 0.88 (0.79-0.98)                                                                 | NR                                   |

|                                                                                                 |      |                                                                                                                |                                                                                        |                                                                                                 |                                   |                                                   |                                                                                   |                                                                                                                                                                                                                                                                                                                                                      |                                                                                                                      |
|-------------------------------------------------------------------------------------------------|------|----------------------------------------------------------------------------------------------------------------|----------------------------------------------------------------------------------------|-------------------------------------------------------------------------------------------------|-----------------------------------|---------------------------------------------------|-----------------------------------------------------------------------------------|------------------------------------------------------------------------------------------------------------------------------------------------------------------------------------------------------------------------------------------------------------------------------------------------------------------------------------------------------|----------------------------------------------------------------------------------------------------------------------|
|                                                                                                 |      |                                                                                                                |                                                                                        | case-control                                                                                    |                                   |                                                   |                                                                                   | AA<br>Total CVD: 0.95 (0.90-1.01)<br>CVD mortality: 0.94 (0.86-1.02)<br>Total CHD: 0.99 (0.94-1.04)<br>Ischemic stroke: 0.99 (0.90-1.10)                                                                                                                                                                                                             |                                                                                                                      |
| Harris et al. <sup>23</sup>                                                                     | 2020 | Case-cohort study/ secondary analysis of ADVANCE study, patients with type 2 diabetes                          | Macrovascular disease<br>Microvascular disease<br>All-cause mortality<br>CVD mortality | 3,576                                                                                           | 654<br>341<br>631<br>330          | Plasma<br>Omega-3<br>Omega-6                      | HR per 1-SD increase of the percentage contribution of total fatty acids (95% CI) | Macrovascular disease<br>Omega-3: 0.87 (0.80-0.95)<br>Omega-6: 0.97 (0.89-1.07)<br>Microvascular disease<br>Omega-3: 1.01 (0.91-1.13)<br>Omega-6: 0.97 (0.86-1.10)<br>All-cause mortality<br>Omega-3: 0.91 (0.84-0.99)<br>Omega-6: 0.97 (0.88-1.07)<br>CVD mortality<br>Omega-3: 0.85 (0.75-0.96)                                                    | NR                                                                                                                   |
| Harris et al. <sup>24</sup>                                                                     | 2021 | Meta-analysis/ age 50-81                                                                                       | All-cause mortality<br>CVD mortality<br>Cancer mortality                               | All: 17 cohorts,<br>42,466<br>CVD: 15 cohorts<br>Cancer: 15 cohorts                             | 15,720<br><br>4,571<br><br>4,284  | Serum<br>EPA<br><br>DPA<br><br>DHA<br><br>EPA+DHA | HR in quintiles (Highest to lowest; 95% CI)                                       | EPA<br>All: 0.82 (0.78-0.87)<br>CVD: 0.85 (0.77-0.94)<br>Cancer: 0.82 (0.74-0.91)<br>DPA<br>All: 0.84 (0.79-0.90)<br>CVD: 0.87 (0.78-0.98)<br>Cancer: 0.79 (0.70-0.90)<br>DHA<br>All: 0.85 (0.81-0.90)<br>CVD: 0.79 (0.72-0.88)<br>Cancer: 0.86 (0.78-0.95)<br>EPA+DHA<br>All: 0.84 (0.79-0.89)<br>CVD: 0.80 (0.73-0.88)<br>Cancer: 0.87 (0.78-0.96) | <0.001<br>0.006<br>0.008<br><br><0.001<br>0.16<br>0.008<br><br>0.01<br>0.002<br>0.06<br><br><0.001<br><0.001<br>0.06 |
| Kamalita et al. <sup>25</sup>                                                                   | 2021 | Prospective cohort/ patients with prior MI, 60-80 years old, Dutch                                             | All-cause mortality<br>CVD mortality                                                   | 4,067                                                                                           | 1,877<br>834                      | Circulating EPA +<br>DHA                          | HR in quintiles (Highest to lowest; 95% CI)                                       | 0.73 (0.63-0.86)<br>0.75 (0.60-0.95)                                                                                                                                                                                                                                                                                                                 | <0.001<br>0.016                                                                                                      |
| Diffenderfer et al. <sup>26</sup>                                                               | 2022 | Plasma fatty acid profiles in US                                                                               | Heart disease mortality rate                                                           | 1,169,621                                                                                       | NR                                | Plasma EPA<br>Omega-3 index                       | Pearson correlation coefficient                                                   | -0.504<br>-0.570                                                                                                                                                                                                                                                                                                                                     | <0.001<br><0.001                                                                                                     |
| <i>Dietary PUFAs</i>                                                                            |      |                                                                                                                |                                                                                        |                                                                                                 |                                   |                                                   |                                                                                   |                                                                                                                                                                                                                                                                                                                                                      |                                                                                                                      |
| Bell et al. <sup>27</sup>                                                                       | 2014 | Population based prospective cohort/ VITAL Study, 50-76 yrs old, western Washington State, recruited 2000-2002 | All-cause mortality<br>CVD mortality<br>Cancer mortality                               | 70,495                                                                                          | 3,051<br>769<br>1,485             | EPA + DHA intake (diet + supplements)             | HR in quartiles (Highest to lowest; 95% CI)                                       | 0.82 (0.73-0.93)<br>0.87 (0.68-1.10)<br>0.77 (0.64-0.92)                                                                                                                                                                                                                                                                                             | 0.001<br>0.158<br>0.001                                                                                              |
| Chen et al. <sup>16</sup><br>(Included Mozaffarian et al. and Bell et al. reports in the table) | 2016 | Meta-analysis/ general populations                                                                             | All-cause mortality                                                                    | 11 studies<br>371,965<br>Dietary intakes (n=7)<br>361,273<br>Circulating levels (n=4)<br>10,692 | 31,185<br><br>27,624<br><br>3,561 | N-3 LCPUFA intake                                 | Summary RR (Highest to lowest; 95% CI)                                            | 0.91 (0.84-0.98)                                                                                                                                                                                                                                                                                                                                     | NR                                                                                                                   |

|                                                                          |      |                                                                         |                                                                                                               |                                                                                 |                                                                                                   |                                |                                             |                                                                                                                                                                  |                                                         |
|--------------------------------------------------------------------------|------|-------------------------------------------------------------------------|---------------------------------------------------------------------------------------------------------------|---------------------------------------------------------------------------------|---------------------------------------------------------------------------------------------------|--------------------------------|---------------------------------------------|------------------------------------------------------------------------------------------------------------------------------------------------------------------|---------------------------------------------------------|
| Zhang et al. <sup>28</sup>                                               | 2018 | Population based prospective cohort/ NIH-AARP Diet and Health Study, US | All-cause mortality<br>CVD mortality<br>Cancer mortality                                                      | 421,309<br>M: 240,729<br>F: 180,580                                             | All<br>M: 54,230<br>F: 30,882<br>CVD<br>M: 14,824<br>F: 7,541<br>Cancer<br>M: 20,041<br>F: 11,526 | Long-chain omega-3 PUFA intake | HR in quintiles (Highest to lowest; 95% CI) | All<br>M: 0.89 (0.86-0.92)<br>F: 0.90 (0.86-0.94)<br>CVD:<br>M: 0.85 (0.80-0.90)<br>F: 0.82 (0.75-0.90)<br>Cancer:<br>M: 0.95 (0.90-1.00)<br>F: 1.01 (0.93-1.09) | < 0.001<br>< 0.001<br><0.001<br>< 0.001<br>0.04<br>0.51 |
| Kamalita et al. <sup>25</sup>                                            | 2021 | Prospective cohort/ patients with prior MI, 60-80 years old, Dutch      | All-cause mortality<br>CVD mortality                                                                          | 4,067                                                                           | 1,877<br>834                                                                                      | Dietary EPA + DHA intake       | HR in quintiles (Highest to lowest; 95% CI) | All: 0.86 (0.75-0.99)<br>CVD: 0.84 (0.68-1.04)                                                                                                                   | 0.11<br>0.22                                            |
| <i>Fish intake and fish oil supplementation</i>                          |      |                                                                         |                                                                                                               |                                                                                 |                                                                                                   |                                |                                             |                                                                                                                                                                  |                                                         |
| Nagata et al. <sup>29</sup>                                              | 2002 | Population based prospective cohort/ Japan, age >= 35, 1992-1999        | All-cause mortality<br>CVD mortality<br>Cancer mortality                                                      | 29,079<br>M: 13,355<br>F: 15,724                                                | 2,062<br>M: 1,163<br>F: 899<br>635<br>M: 308<br>F: 327<br>653<br>M: 400<br>F: 253                 | Fish oil                       | HR in quintiles (Highest to lowest; 95% CI) | M: 0.87 (0.73-1.05)<br>F: 0.77 (0.62-0.94)<br><br>M: 0.76 (0.54-1.07)<br>F: 0.77 (0.55-1.00)<br><br>M: 0.89 (0.66-1.20)<br>F: 0.70 (0.47-1.05)                   | 0.38<br>0.01<br><br>0.27<br>0.16<br><br>0.52<br>0.15    |
| Li et al. <sup>30</sup>                                                  | 2020 | Population based prospective cohort/ UK biobank                         | All-cause mortality<br>CVD mortality                                                                          | 427,678                                                                         | 12,928<br>3282                                                                                    | Fish oil supplementation       | HR (Yes to No; 95% CI)                      | 0.87 (0.83-0.90)<br>0.84 (0.78-0.91)                                                                                                                             | NR                                                      |
| Jayedti et al. <sup>31</sup>                                             | 2021 | Meta-analysis/ patients with type 2 diabetes                            | All-cause mortality<br>CVD diseases<br>CHD<br>MI<br>stroke                                                    | Total:<br>9 studies<br>(57,394)<br>8 studies<br>(57,077)<br>4 studies<br>(8781) | NR<br><br>791<br>376<br>372                                                                       | Fish consumption               | Pooled RR (Highest to lowest; 95% CI)       | 0.86 (0.76-0.96)<br><br>0.61 (0.29-0.93)<br>NS<br>NS                                                                                                             | NR                                                      |
| Liu et al. <sup>32</sup>                                                 | 2022 | Population based prospective cohort/ UK Biobank, UK                     | Overall cancer                                                                                                | 470,804                                                                         | 28,417                                                                                            | Fish oil supplementation       | HR (Yes to No; 95% CI)                      | 0.97 (0.95-1.00)                                                                                                                                                 | 0.06                                                    |
| Ma et al. <sup>33</sup>                                                  | 2022 | Prospective cohort/ patients with hypertension, UK Biobank, UK          | Incidence of cardiometabolic multimorbidity (CMM)<br>All-cause mortality<br>CVD mortality<br>Cancer mortality | 81,579                                                                          | 15,990<br><br>6,456<br>1,308<br>3,307                                                             | Fish oil supplementation       | HR (Yes to No; 95% CI)                      | 0.92 (0.89-0.96)<br><br>0.90 (0.85-0.95)<br>0.86 (0.76-0.98)<br>0.99 (0.91-1.07)                                                                                 | <0.001<br><br>0.027<br>0.742                            |
| Abbreviations: HR, hazards ratio; NR, not recorded; NS, not significant. |      |                                                                         |                                                                                                               |                                                                                 |                                                                                                   |                                |                                             |                                                                                                                                                                  |                                                         |

## References

- Noori N, Dukkipati R, Kovesdy CP, et al. Dietary omega-3 fatty acid, ratio of omega-6 to omega-3 intake, inflammation, and survival in long-term hemodialysis patients. *Am J of Kidney Dis.* 2011;58(2):248-256.
- Harris WS, Luo J, Pottala JV, et al. Red blood cell polyunsaturated fatty acids and mortality in the Women's Health Initiative Memory Study. *J Clin Lipidol.* 2017;11(1):250-259.e255.
- Otsuka R, Tange C, Nishita Y, et al. Fish and meat intake, serum eicosapentaenoic acid and docosahexaenoic acid levels, and mortality in community-dwelling Japanese older persons. *Int J Environ Res Public Health.* 2019;16(10).

4. Zhuang P, Wang W, Wang J, Zhang Y, Jiao J. Polyunsaturated fatty acids intake, omega-6/omega-3 ratio and mortality: Findings from two independent nationwide cohorts. *Clin Nutr*. 2019;38(2):848-855.
5. Wang Y, Crawford MA, Chen J, et al. Fish consumption, blood docosahexaenoic acid and chronic diseases in Chinese rural populations. *Comp Biochem Physiol A Mol Integr Physiol*. 2003;136(1):127-140.
6. Lindberg M, Saltvedt I, Sletvold O, Bjerve KS. Long-chain n-3 fatty acids and mortality in elderly patients. *Am J Clin Nutr*. 2008;88(3):722-729.
7. Chattipakorn N, Settakorn J, Petsophonakul P, et al. Cardiac mortality is associated with low levels of omega-3 and omega-6 fatty acids in the heart of cadavers with a history of coronary heart disease. *Nutr Res*. 2009;29(10):696-704.
8. Lee S-H, Shin M-J, Kim J-S, et al. Blood eicosapentaenoic acid and docosahexaenoic acid as predictors of all-cause mortality in patients with acute myocardial infarction—data from Infarction Prognosis Study (IPS) Registry. *Circ J*. 2009;73(12):2250-2257.
9. Pottala JV, Garg S, Cohen BE, Whooley MA, Harris WS. Blood eicosapentaenoic and docosahexaenoic acids predict all-cause mortality in patients with stable coronary heart disease: the Heart and Soul study. *Circ Cardiovasc Qual Outcomes*. 2010;3(4):406-412.
10. Petrone AB, Weir N, Hanson NQ, et al. Omega-6 fatty acids and risk of heart failure in the Physicians' Health Study. *Am J Clin Nutr*. 2012;97(1):66-71.
11. Mozaffarian D, Lemaitre RN, King IB, et al. Plasma phospholipid long-chain  $\omega$ -3 fatty acids and total and cause-specific mortality in older adults: a cohort study. *Ann Intern Med*. 2013;158(7):515-525.
12. Wu JHY, Lemaitre RN, King IB, et al. Circulating omega-6 polyunsaturated fatty acids and total and cause-specific mortality. *Circulation*. 2014;130(15):1245-1253.
13. Eide IA, Dahle DO, Svensson M, et al. Plasma levels of marine n-3 fatty acids and cardiovascular risk markers in renal transplant recipients. *Eur J Clin Nutr*. 2016;70(7):824-830.
14. Kleber ME, Delgado GE, Lorkowski S, März W, von Schacky C. Omega-3 fatty acids and mortality in patients referred for coronary angiography. The Ludwigshafen Risk and Cardiovascular Health Study. *Atherosclerosis*. 2016;252:175-181.
15. Miura K, Hughes MCB, Ungerer JPJ, Green AC. Plasma eicosapentaenoic acid is negatively associated with all-cause mortality among men and women in a population-based prospective study. *Nutr Res*. 2016;36(11):1202-1209.
16. Chen GC, Yang J, Eggersdorfer M, Zhang W, Qin LQ. N-3 long-chain polyunsaturated fatty acids and risk of all-cause mortality among general populations: a meta-analysis. *Sci Rep*. 2016;6:28165.
17. Delgado GE, März W, Lorkowski S, von Schacky C, Kleber ME. Omega-6 fatty acids: opposing associations with risk—The Ludwigshafen Risk and Cardiovascular Health Study. *J Clin Lipidol*. 2017;11(4):1082-1090.e1014.
18. Hamazaki K, Iso H, Eshak ES, et al. Plasma levels of n-3 fatty acids and risk of coronary heart disease among Japanese: The Japan Public Health Center-based (JPHC) study. *Atherosclerosis*. 2018;272:226-232.
19. Harris WS, Tintle NL, Etherton MR, Vasan RS. Erythrocyte long-chain omega-3 fatty acid levels are inversely associated with mortality and with incident cardiovascular disease: The Framingham Heart Study. *J Clin Lipidol*. 2018;12(3):718-727.e716.
20. Kamleh MA, McLeod O, Checa A, et al. Increased levels of circulating fatty acids are associated with protective effects against future cardiovascular events in nondiabetics. *J Proteome Res*. 2018;17(2):870-878.
21. Miura K, Hughes MCB, Ungerer JPJ, Smith DD, Green AC. Absolute versus relative measures of plasma fatty acids and health outcomes: example of phospholipid omega-3 and omega-6 fatty acids and all-cause mortality in women. *Eur J Nutr*. 2018;57(2):713-722.
22. Marklund M, Wu JHY, Imamura F, et al. Biomarkers of dietary omega-6 fatty acids and incident cardiovascular disease and mortality. *Circulation*. 2019;139(21):2422-2436.

23. Harris K, Oshima M, Sattar N, et al. Plasma fatty acids and the risk of vascular disease and mortality outcomes in individuals with type 2 diabetes: results from the ADVANCE study. *Diabetologia*. 2020;63(8):1637-1647.
24. Harris WS, Tintle NL, Imamura F, et al. Blood n-3 fatty acid levels and total and cause-specific mortality from 17 prospective studies. *Nat Commun*. 2021;12(1):2329.
25. Pertiwi K, Kùpers LK, Goede Jd, Zock PL, Kromhout D, Geleijnse JM. Dietary and circulating long-chain omega-3 polyunsaturated fatty acids and mortality risk after myocardial infarction: a long-term follow-up of the Alpha Omega Cohort. *J Am Heart Assoc*. 2021;10(23):e022617.
26. Diffenderfer MR, Rajapakse N, Pham E, et al. Plasma fatty acid profiles: relationships with sex, age, and state-reported heart disease mortality rates in the United States. *J Clin Lipidol*. 2022;16(2):184-197.
27. Bell GA, Kantor ED, Lampe JW, Kristal AR, Heckbert SR, White E. Intake of long-chain  $\omega$ -3 fatty acids from diet and supplements in relation to mortality. *Am J Epidemiol*. 2014;179(6):710-720.
28. Zhang Y, Zhuang P, He W, et al. Association of fish and long-chain omega-3 fatty acids intakes with total and cause-specific mortality: prospective analysis of 421 309 individuals. *J Intern Med*. 2018;284(4):399-417.
29. Nagata C, Takatsuka N, Shimizu H. Soy and fish oil intake and mortality in a Japanese community. *Am J Epidemiol*. 2002;156(9):824-831.
30. Li Z-H, Zhong W-F, Liu S, et al. Associations of habitual fish oil supplementation with cardiovascular outcomes and all cause mortality: evidence from a large population based cohort study. *BMJ*. 2020;368:m456.
31. Jayedi A, Soltani S, Abdolshahi A, Shab-Bidar S. Fish consumption and the risk of cardiovascular disease and mortality in patients with type 2 diabetes: a dose-response meta-analysis of prospective cohort studies. *Crit Rev Food Sci Nutr*. 2021;61(10):1640-1650.
32. Liu Z, Luo Y, Ren J, et al. Association between fish oil supplementation and cancer risk according to fatty fish consumption: A large prospective population-based cohort study using UK Biobank. *Int J Cancer*. 2022;150(4):562-571.
33. Ma T, He L, Luo Y, et al. Associations of baseline use of fish oil with progression of cardiometabolic multimorbidity and mortality among patients with hypertension: a prospective study of UK Biobank. *Eur J Nutr*. 2022.
